# Supplementary material
Source: PubMed Central journal article supplement (PMC5719487)
Supplement: NIHMS923228-supplement-1.pdf [file NIHMS923228-supplement-1.pdf]

## **Supplementary Appendix Table of Contents**

1) List of participating investigators: page 2–3

2) Methods: page 4

3) Tables: pages 5–9

4) Figures: pages 10–12

CONFIDENTIAL

## List of Participating Investigators

In addition to the authors, the following investigators (listed by country in alphabetical order) participated in the study: Argentina: E. Korbenfeld (Buenos Aires), F.S. Palazzo (Tucuman), G. Recondo (Buenos Aires), M. Chacon (Buenos Aires), M.E. Richardet (Cordoba), M. Susana (Buenos Aires); Australia: D. Pook (Victoria), G. Toner (Victoria), H. Gurney (New South Wales), I. Davis (Victoria), K.B. Pittman (South Australia); Austria: A. Kavina (Wien), M. Schmidinger (Vienna), W. Loidl (Linz); Belgium: D. Schallier (Brussels), J-P. Machiels (Bruxelles), P. Schoffski (Leuven), S. Rottey (Gent); Brazil: C. Dzik (Sao Paulo), F. Schutz (Sao Paulo), F.A. Franke (Rio Grande Do Sul); Canada: C.K. Kollmannsberger (Vancouver, BC), D. Heng (Calgary, AB), J. Knox (Toronto, ON), L. Wood (Halifax, NS), N. Basappa (Edmonton, AB), P. Zalewski (Oshawa, ON), S. Ghedira (Moncton, NB), W. Miller (Montreal, QC); Czech Republic: B. Melichar (Olomouc), E. Kubala (Hradec Kralove), J. Prausova (Prague); Denmark: F. Donskov (Aarhus), N.V. Jensen (Odense), P. Geertsen (Herlev); Finland: P. Bono (Helsinki); France: A. Ravaud (Bordeaux), B. Escudier (Villejuif Cedex), C. Chevreau (Toulouse Cedex 9); F. Rolland (Saint Herblain Cedex), G. Gravis (Marseille Cedex 9), J-M. Tourani (Poitiers), L. Geoffrois (Vandoeuvre Les Nancy), S. Oudard (Paris); Germany: A. Heidenreich (Aachen), F. Imkamp (Hannover), J. Bedke (Tuebingen), J. Meiler (Essen), M. Retz (Munich), P. Goebell (Erlangen), S. Pahernik (Heidelberg); Greece: A. Bamias (Athens), K. Papazsis (Thessaloniki); Ireland: J.A. McCaffrey (Dublin), R. McDermott (Dublin); Israel: A. Neumann (Haifa), R. Berger (Ramat-gan), V. Neiman (Petah Tikva); Italy: A. Santoro (Rozzano), C. Sternberg (Roma), F. Roila (Terni), G. Procopio (Milano), M. Maio (Siena), S. Bracarda (Arezzo), U. De Giorgi (Meldola); Japan: F. Hongo (Kyoto), G. Kimura (Tokyo), H. Kanayama (Tokushima), H. Kitamura (Hokai-do), H. Kume (Tokyo), H. Uemura (Osaka), J. Yonese (Tokyo), K. Tanabe

(Tokyo), K. Tatsugami (Fukuoka), M. Eto (Kumamoto), M. Oya (Tokyo), M. Saito (Akita), M. Uemura (Osaka), M. Yao (Kangawa), N. Shinohara (Hokkaido), R. Yamaguchi (Tokyo), S. Fukasawa (Chiba), T. Kato (Yamagata), T. Sugiyama (Shizuoka), W. Obara (Iwate); Norway: D. Heinrich (Lorenskog), O. Straume (Bergen); Poland: C. Szczylik (Warszawa), G. Slomian (Energetykow), J. Wojcik-Tomaszewska (Gdansk), P. Tomczak (Poznan), R. Zdrojowy (Wroclaw); Romania: C. Volovat (Iasi), D. Lungulescu (Craiova), I. Sinescu (Bucharest); Russian Federation: E. Poddubskaya (Moscow), P. Karlov (St. Petersburg), V. Matveev (Moscow); Spain: C. Suarez (Barcelona), D. Castellano (Madrid), J. Puente (Madrid), J.A. Arranz (Madrid), J.L. Perez Gracia (Navarra), X. Garcia Del Muro (Barcelona); Sweden: A. Jellvert (Gothenberg), U. Harmenberg (Solna); United Kingdom: J. Wagstaff (Carmarthenshire), M. Gore (London), P. Nathan (London), T. Eisen (Cambridgeshire); United States: A. Alva (Ann Arbor, MI), A. Amin (Charlotte, NC), B. Carthon (Atlanta, GA), D. McDermott (Boston, MA), D. Quinn (Los Angeles, CA), D. Vaena (Iowa City, IA), E. Lam (Aurora, CO), E. Plimack (Philadelphia, PA), F. Millard (La Jolla, CA), F. Quddus (Greenville, SC), H. Beltran (New York, NY), H. Drabkin (Charleston, SC), H-J. Hammers (Baltimore, MD), J. Brugarolas (Dallas, TX), J. Clark (Maywood, IL), J. Hainsworth (Nashville, TN), J. Sarantopoulos (San Antonio, TX), J. Sosman (Nashville, TN), J.T. Beck (Fayetteville, AR), L. Fong (San Francisco, CA), M. Fishman (Tampa, FL), M. Harrison (Durham, NC), N. Dawson (Washington, DC), P. Sharma (Houston, TX), R. Figlin (Los Angeles, CA), R. Motzer (New York, NY), S. George (Buffalo, NY), S. Srinivas (Stanford, CA), S. Tykodi (Seattle, WA), T. Kuzel (Chicago, IL), T. Logan (Indianapolis, IN), T. Olencki (Columbus, OH), U. Vaishampayan (Detroit, MI), W. Voelzke (Richmond, VA)

## **Supplementary Methods: Quality of Life**

Patients' quality of life was assessed using the functional assessment of cancer therapy - kidney symptom index - disease-related symptoms (FKSI-DRS) score, a subscale of the 15-item FKSI (FKSI-15)<sup>1</sup>. Patients at each site completed the FKSI-DRS questionnaire after randomization and prior to dosing on day 1 of each cycle beginning with cycle 2.

The FKSI-DRS questionnaire comprises nine symptom-specific questions that address lack of energy, pain, weight loss, bone pain, fatigue, dyspnea, cough, fevers, and hematuria.<sup>1</sup>

Questionnaire completion was defined as answering at least five of nine items. Each symptom was rated on a Likert-type scale ranging from 0 to 4, with 0 representing "Not at all" and 4 representing "Very much." Scores for each answered item in each questionnaire were reversed and individual reversed items were summed to obtain a score. This score was multiplied by the number of items in the subscale (i.e., nine) and divided by the number of items answered. A summary score ranging from 0 to 36 was then produced, with 36 being the best possible score (no symptoms) and 0 being the worst possible score (all worst symptoms).

The FKSI-DRS completion rate, defined as the proportion of questionnaires completed and received out of the total number of questionnaires anticipated to be completed for patients still on treatment or in follow-up, was calculated and summarized.

**Table S1. Antitumor Activity (All Randomized Patients).**

|                                             | Nivolumab<br>N=410 | Everolimus<br>N=411 |
|---------------------------------------------|--------------------|---------------------|
| Objective response rate, n (%)              | 103 (25)           | 22 (5)              |
| Odds ratio (95% CI)                         | 5.98 (3.68–9.72)   |                     |
| Best overall response, n (%)                |                    |                     |
| Complete response                           | 4 (1)              | 2 (1)               |
| Partial response                            | 99 (24)            | 20 (5)              |
| Stable disease                              | 141 (34)           | 227 (55)            |
| Progressive disease                         | 143 (35)           | 114 (28)            |
| Not evaluated                               | 23 (6)             | 48 (12)             |
| Median time to response, months (range)     | 3.5 (1.4–24.8)     | 3.7 (1.5–11.2)      |
| Median duration of response, months (range) | 12.0 (0–27.6+)     | 12.0 (0–22.2+)      |

**Table S2. Quality of Life (FKSI-DRS) Completion Rate and Score Summary.**

| Visit             | Nivolumab<br>N=410                              |                    |     |                      | Everolimus<br>N=411                             |                    |     |                         |
|-------------------|-------------------------------------------------|--------------------|-----|----------------------|-------------------------------------------------|--------------------|-----|-------------------------|
|                   | No patients in study/No of valid questionnaires | Completion rate, % | N   | Score Median (range) | No patients in study/No of valid questionnaires | Completion rate, % | N   | Score Median (range)    |
| Week 1 (Baseline) | 406/327                                         | 81                 | 327 | 31.0 (11.0–36.0)     | 397/363                                         | 91                 | 363 | 31.0 (6.0–36.0)         |
| Week 4            | 386/359                                         | 93                 | 359 | 31.0 (15.0–36.0)     | 371/343                                         | 93                 | 343 | 29.0 (13.0–36.0)        |
| Week 8            | 347/319                                         | 92                 | 319 | 31.0 (13.0–36.0)     | 317/288                                         | 91                 | 288 | 30.0 (0.0–36.0)         |
| Week 12           | 316/282                                         | 89                 | 282 | 32.0 (17.0–36.0)     | 246/232                                         | 94                 | 232 | 30.0 (16.0–36.0)        |
| Week 16           | 277/246                                         | 89                 | 246 | 32.0 (14.0–36.0)     | 214/198                                         | 93                 | 198 | 31.0 (14.0–244/22136.0) |
| Week 20           | 244/221                                         | 91                 | 221 | 32.0 (18.0–36.0)     | 176/165                                         | 94                 | 165 | 31.0 (12.0–36.0)        |
| Week 24           | 218/197                                         | 90                 | 197 | 32.0 (19.0–          | 164/151                                         | 92                 | 151 | 31.0 (14.0–             |

|         |         |    |     |                      |         |    |     |                      |
|---------|---------|----|-----|----------------------|---------|----|-----|----------------------|
|         |         |    |     | 36.0)                |         |    |     | 36.0)                |
| Week 28 | 193/174 | 90 | 174 | 33.0 (18.0–<br>36.0) | 139/129 | 93 | 129 | 31.0 (17.0–<br>36.0) |
| Week 32 | 182/168 | 92 | 168 | 33.0 (19.0–<br>36.0) | 126/109 | 87 | 109 | 31.0 (18.0–<br>36.0) |
| Week 36 | 172/153 | 89 | 153 | 33.0 (17.0–<br>36.0) | 114/104 | 91 | 104 | 31.0 (18.0–<br>36.0) |
| Week 40 | 160/141 | 88 | 141 | 33.0 (19.0–<br>36.0) | 104/91  | 88 | 91  | 30.0 (17.0–<br>36.0) |
| Week 44 | 144/126 | 88 | 126 | 33.0 (22.0–<br>36.0) | 94/80   | 85 | 80  | 31.0 (13.0–<br>36.0) |
| Week 48 | 135/120 | 89 | 120 | 33.0 (22.0–<br>36.0) | 90/77   | 86 | 77  | 31.0 (18.0–<br>36.0) |
| Week 52 | 123/105 | 85 | 105 | 33.0 (22.0–<br>36.0) | 78/69   | 89 | 69  | 31.0 (21.0–<br>36.0) |
| Week 56 | 112/97  | 87 | 97  | 33.0 (23.0–<br>36.0) | 73/64   | 88 | 64  | 31.0 (11.0–<br>36.0) |
| Week 60 | 107/96  | 90 | 96  | 33.5 (18.0–<br>36.0) | 62/53   | 86 | 53  | 31.0 (18.0–<br>36.0) |
| Week 64 | 105/88  | 84 | 88  | 34.0 (21.0–          | 58/47   | 81 | 47  | 30.0 (18.0–          |

|          |       |    |    |                      |       |    |    |                      |
|----------|-------|----|----|----------------------|-------|----|----|----------------------|
|          |       |    |    | 36.0)                |       |    |    | 36.0)                |
| Week 68  | 95/78 | 82 | 78 | 34.0 (21.0–<br>36.0) | 48/37 | 77 | 37 | 31.0 (17.0–<br>36.0) |
| Week 72  | 84/68 | 81 | 68 | 34.0 (22.0–<br>36.0) | 42/32 | 76 | 32 | 32.0 (15.0–<br>36.0) |
| Week 76  | 78/64 | 82 | 64 | 33.0 (21.0–<br>36.0) | 37/30 | 81 | 30 | 31.5 (16.0–<br>36.0) |
| Week 80  | 71/58 | 82 | 58 | 34.0 (23.0–<br>36.0) | 33/26 | 79 | 26 | 31.0 (17.0–<br>36.0) |
| Week 84  | 61/49 | 80 | 49 | 33.0 (22.0–<br>36.0) | 28/23 | 82 | 23 | 30.0 (13.0–<br>36.0) |
| Week 88  | 55/48 | 87 | 48 | 33.5 (22.0–<br>36.0) | 23/17 | 74 | 17 | 30.0 (15.0–<br>35.0) |
| Week 92  | 44/35 | 80 | 35 | 34.0 (23.0–<br>36.0) | 20/14 | 70 | 14 | 30.0 (20.0–<br>36.0) |
| Week 96  | 37/32 | 87 | 32 | 34.0 (23.0–<br>36.0) | 19/14 | 74 | 14 | 29.5 (17.0–<br>36.0) |
| Week 100 | 33/30 | 91 | 30 | 33.5 (24.0–<br>36.0) | 14/9  | 64 | 9  | 29.0 (18.0–<br>31.0) |
| Week 104 | 26/21 | 81 | 21 | 34.0 (25.0–          | 10/9  | 90 | 9  | 30.0 (20.0–          |



|          |       |    |    |                      |     |     |   |                      |
|----------|-------|----|----|----------------------|-----|-----|---|----------------------|
|          |       |    |    | 36.0)                |     |     |   | 36.0)                |
| Week 108 | 19/15 | 79 | 15 | 32.0 (21.0–<br>36.0) | 5/2 | 40  | 2 | 33.0 (30.0–<br>36.0) |
| Week 112 | 15/12 | 80 | 12 | 34.0 (28.0–<br>36.0) | 2/2 | 100 | 2 | 32.0 (28.0–<br>36.0) |

CONFIDENTIAL

**Figure S1. CONSORT Diagram for Patient Disposition.**

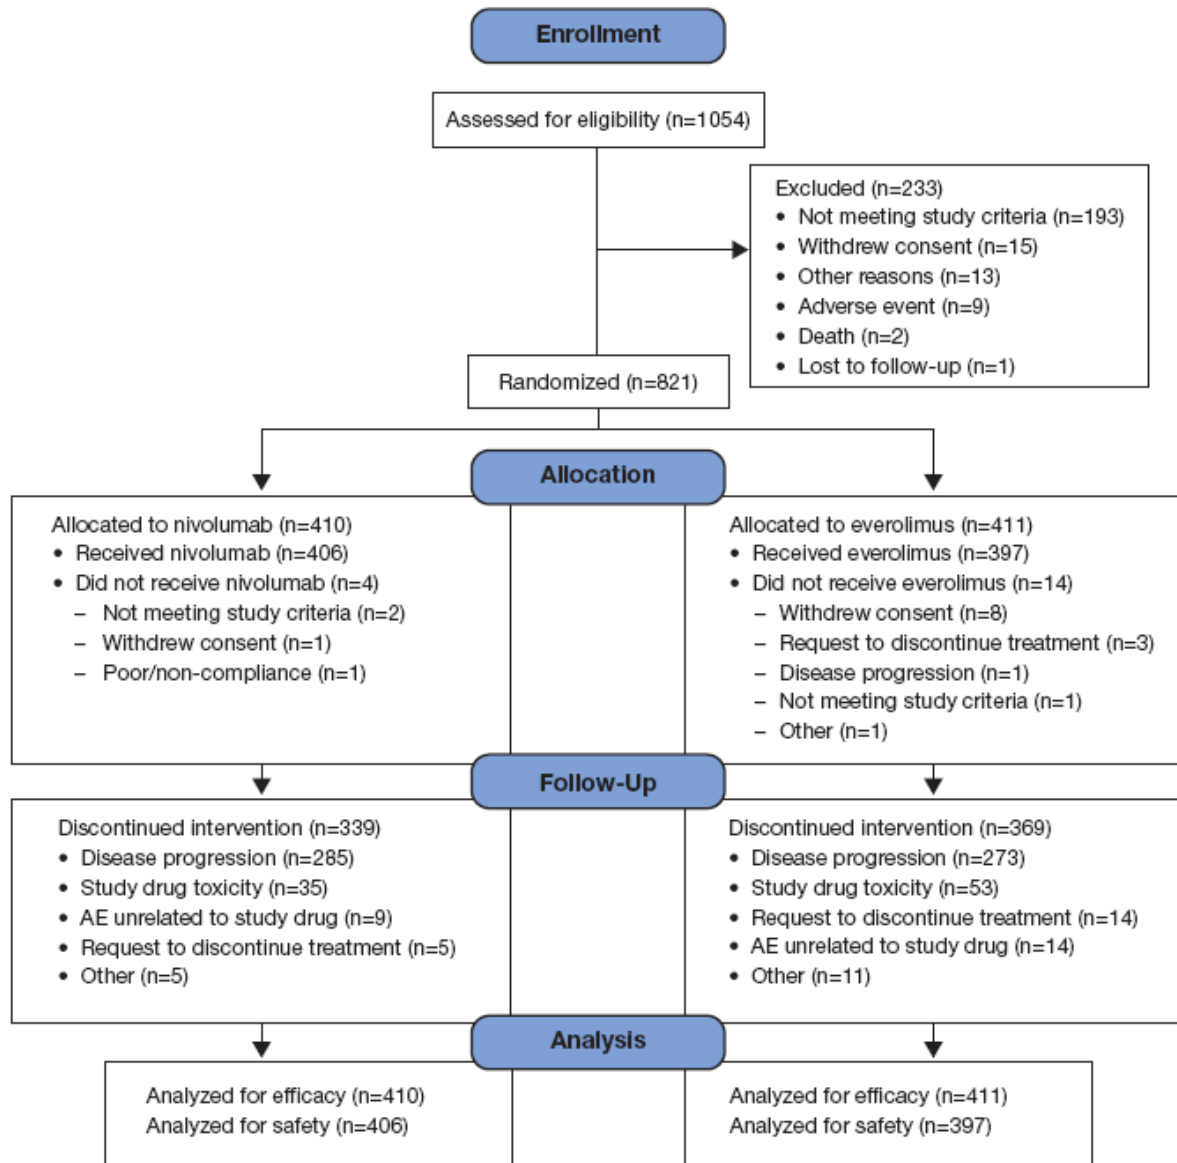

Figure S2. Duration of Response.

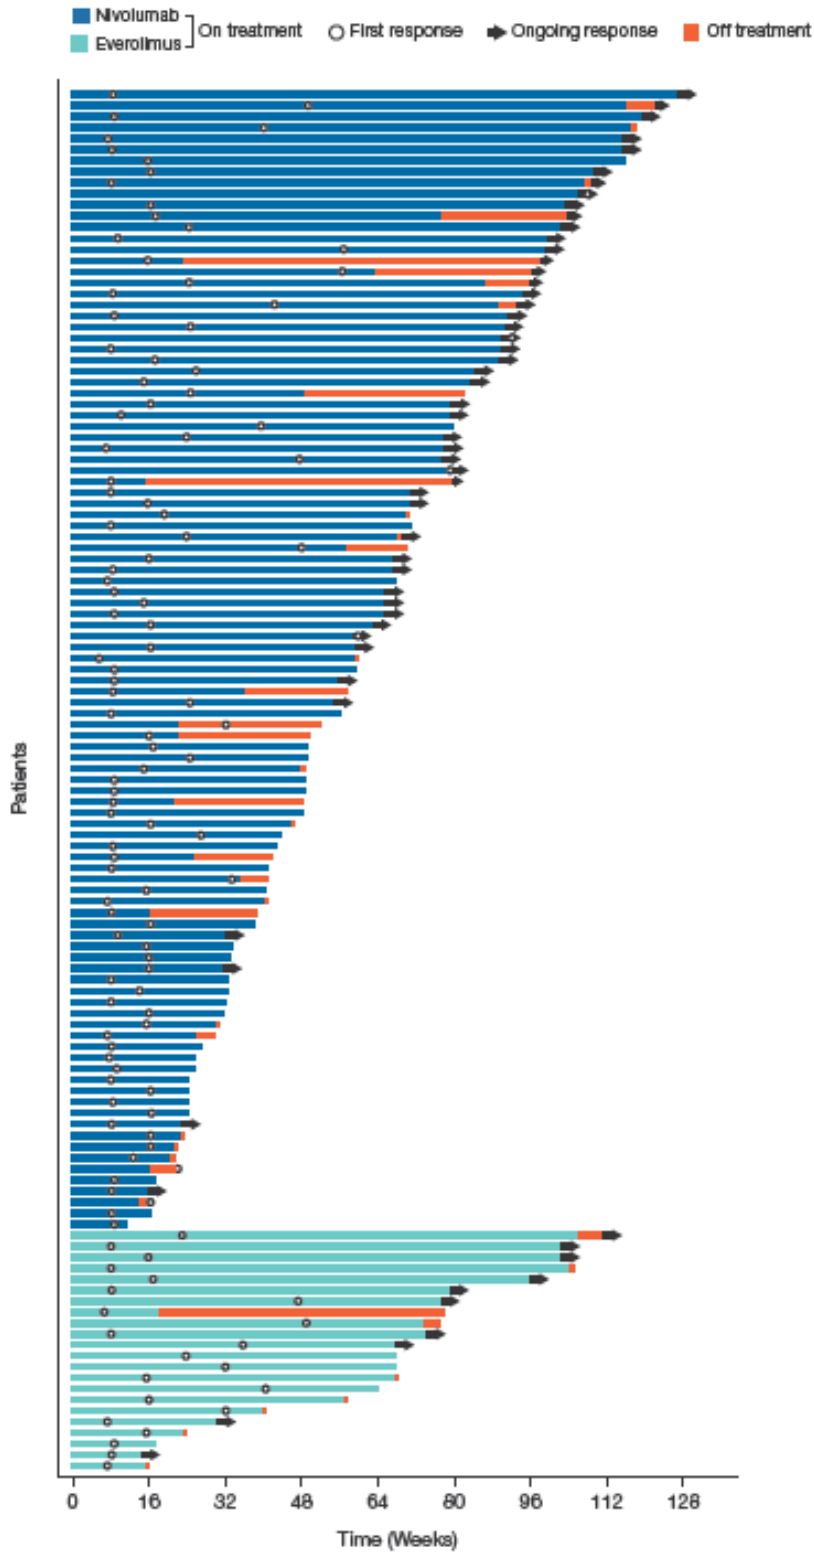

**Figure S3. Kaplan–Meier Curve for Overall Survival by PD-L1 Expression  $\geq 5\%$  (A) and PD-L1 expression  $< 5\%$  (B).**

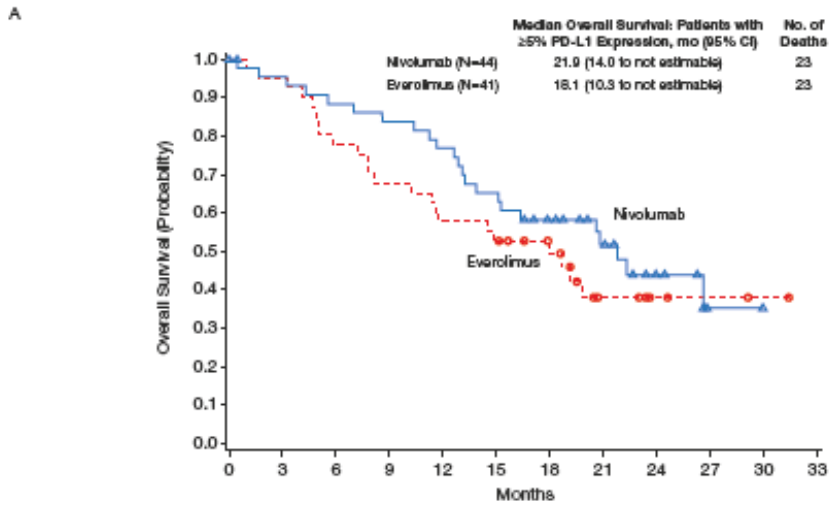

| No. of patients at risk |    | 0  | 3  | 6  | 9  | 12 | 15 | 18 | 21 | 24 | 27 | 30 | 33 |
|-------------------------|----|----|----|----|----|----|----|----|----|----|----|----|----|
| Nivolumab               | 44 | 41 | 38 | 30 | 33 | 28 | 22 | 16 | 9  | 1  | 1  | 0  | 0  |
| Everolimus              | 41 | 38 | 31 | 27 | 23 | 21 | 17 | 6  | 3  | 2  | 1  | 0  | 0  |

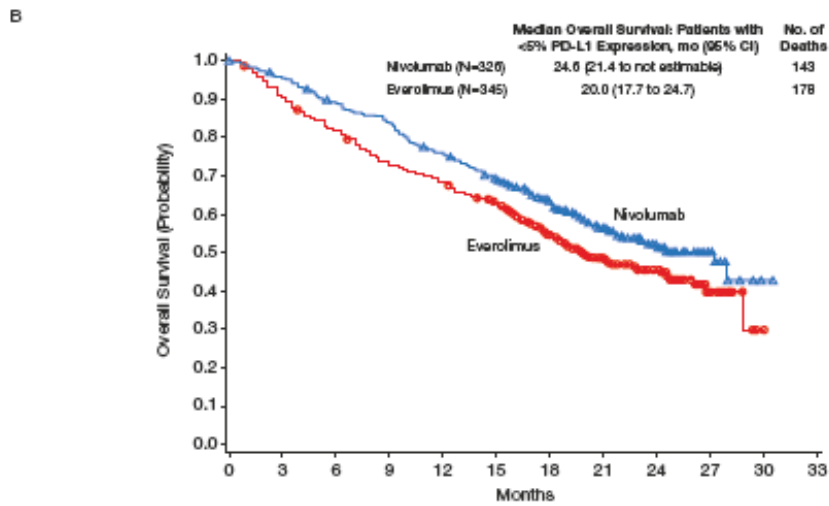

| No. of patients at risk |     | 0   | 3   | 6   | 9   | 12  | 15  | 18  | 21 | 24 | 27 | 30 | 33 |
|-------------------------|-----|-----|-----|-----|-----|-----|-----|-----|----|----|----|----|----|
| Nivolumab               | 326 | 310 | 286 | 270 | 243 | 219 | 168 | 109 | 57 | 25 | 2  | 0  | 0  |
| Everolimus              | 345 | 306 | 275 | 246 | 229 | 208 | 160 | 105 | 57 | 18 | 1  | 0  | 0  |

## Reference List

1. Cella D, Yount S, Brucker PS, et al. Development and validation of a scale to measure disease-related symptoms of kidney cancer. *Value Health* 2007;10:285-93.

CONFIDENTIAL
